# Supplementary material for: Evaluation of the Role of Functional Constraints on the Integrity of an Ultraconserved Region in the Genus Drosophila
Source: PubMed Central journal article supplement (PMC3271063; doi:10.1371/journal.pgen.1002475), 2012-02-02

A

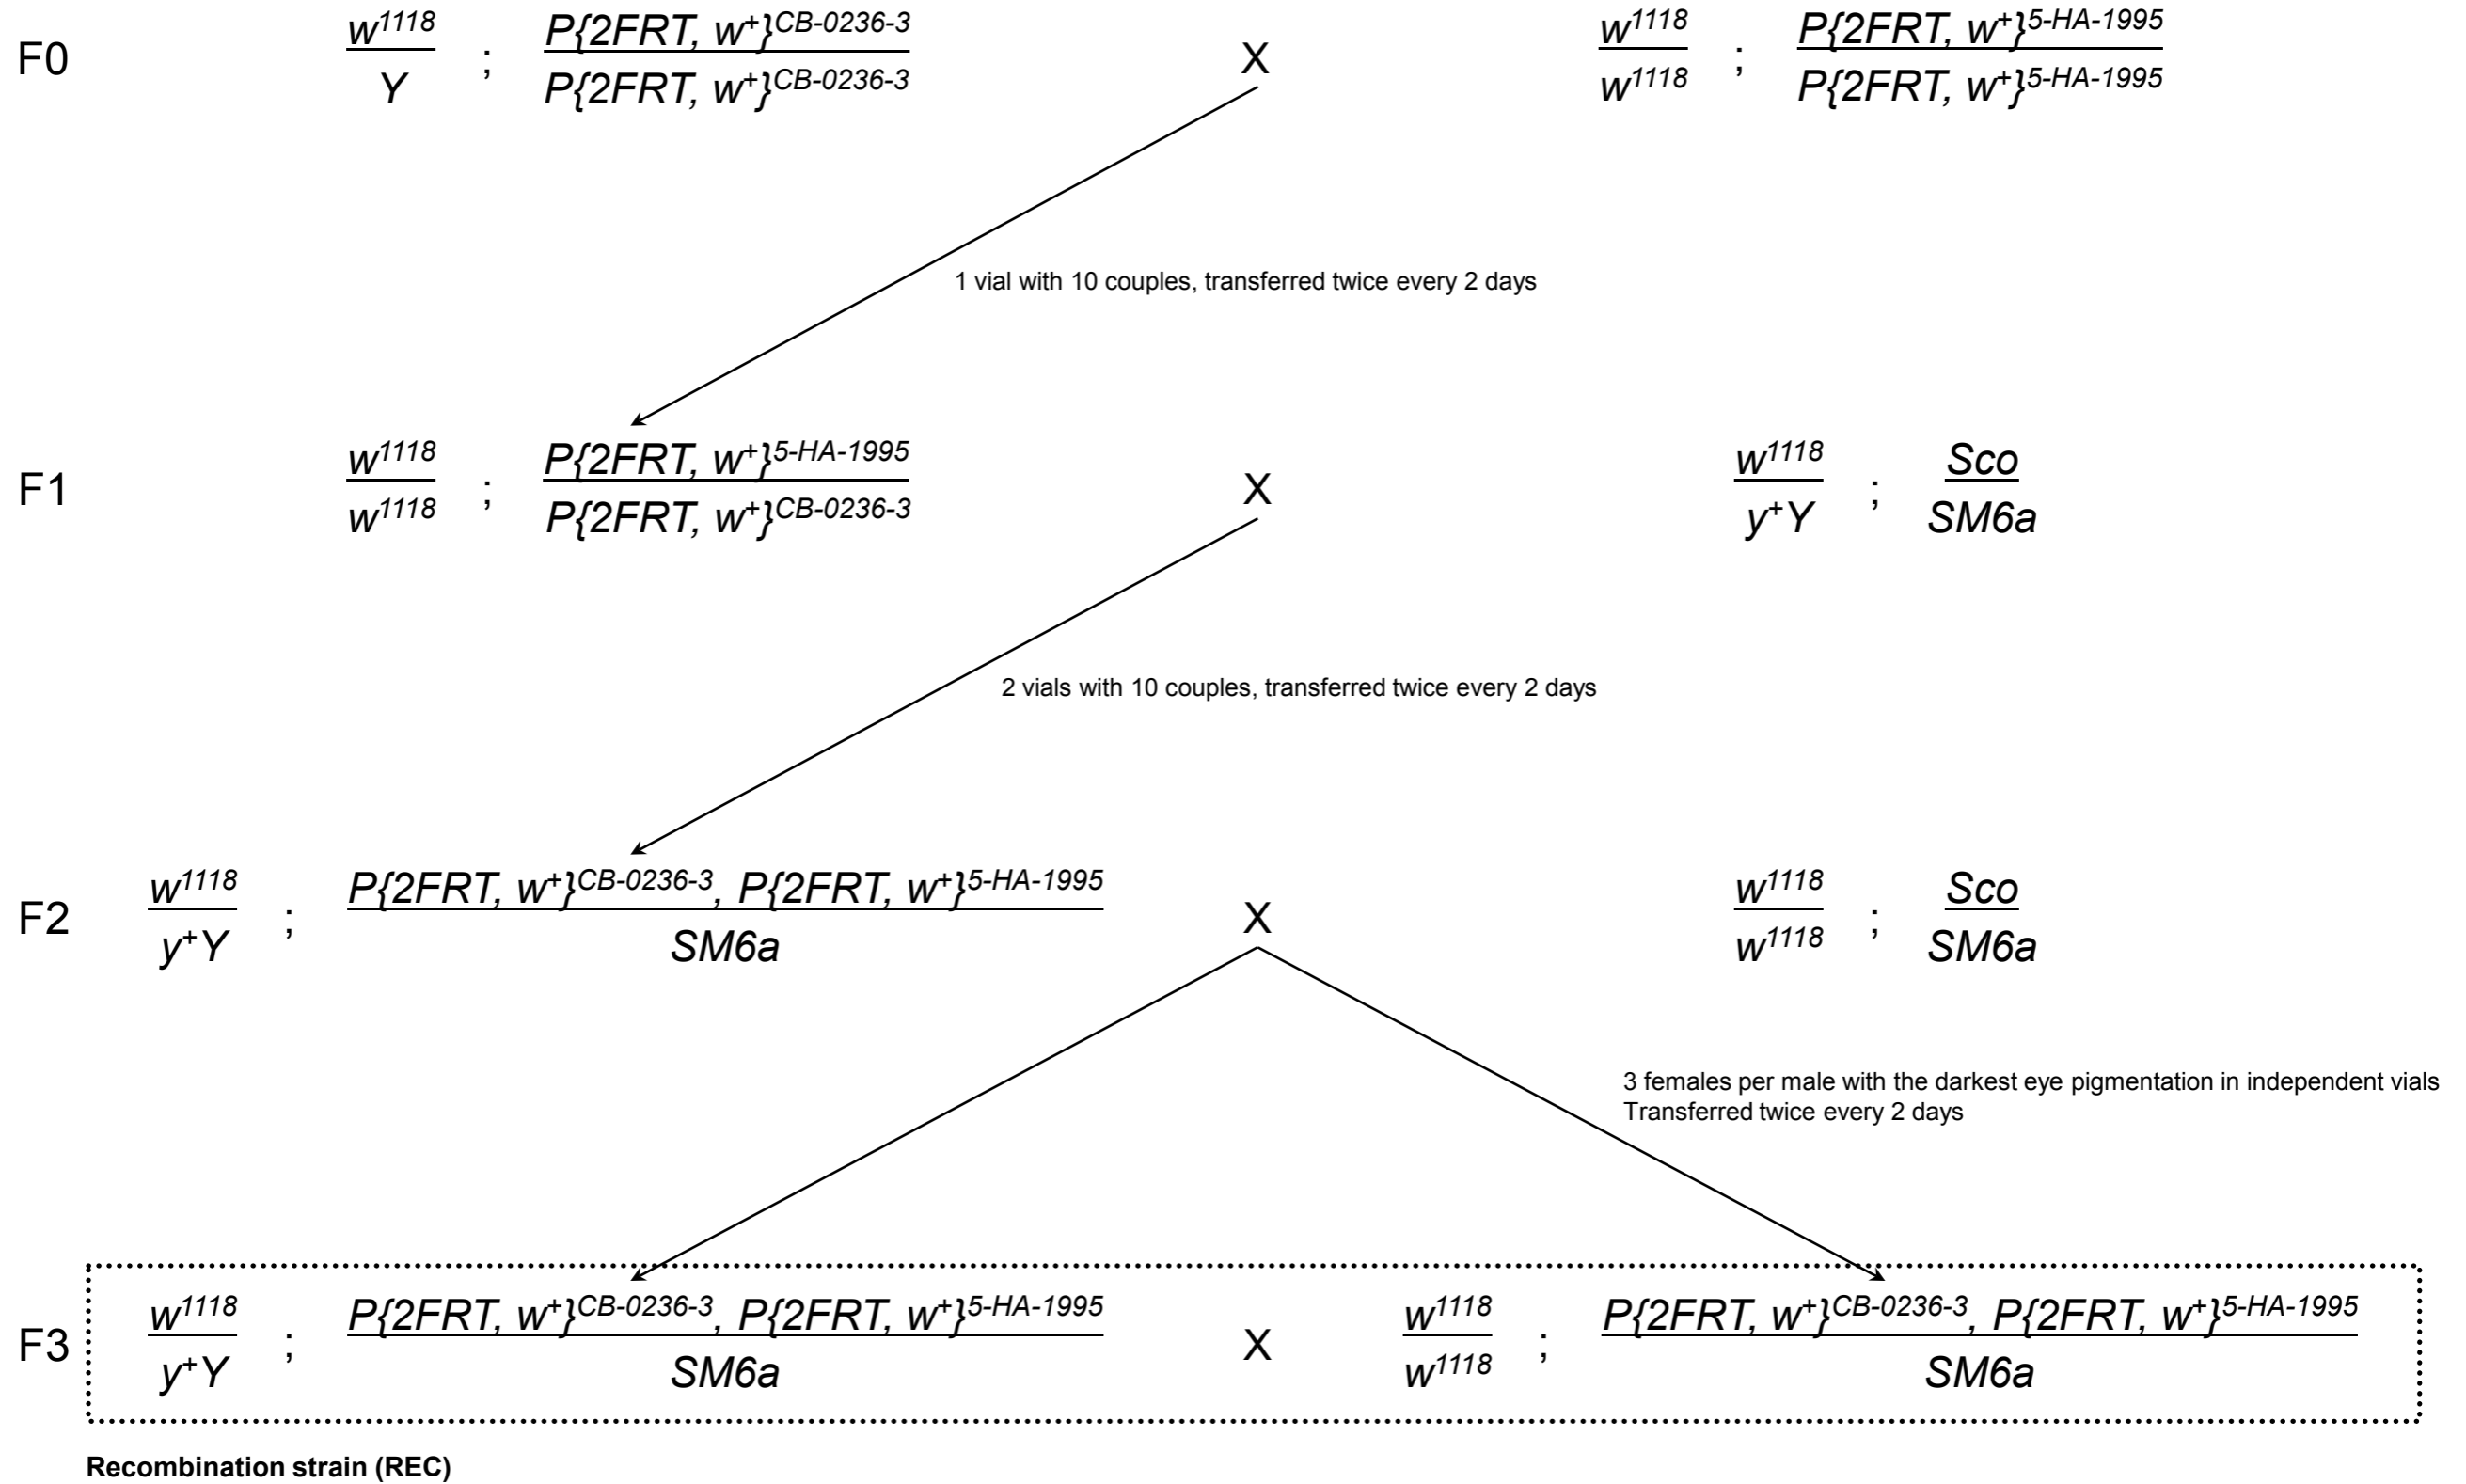

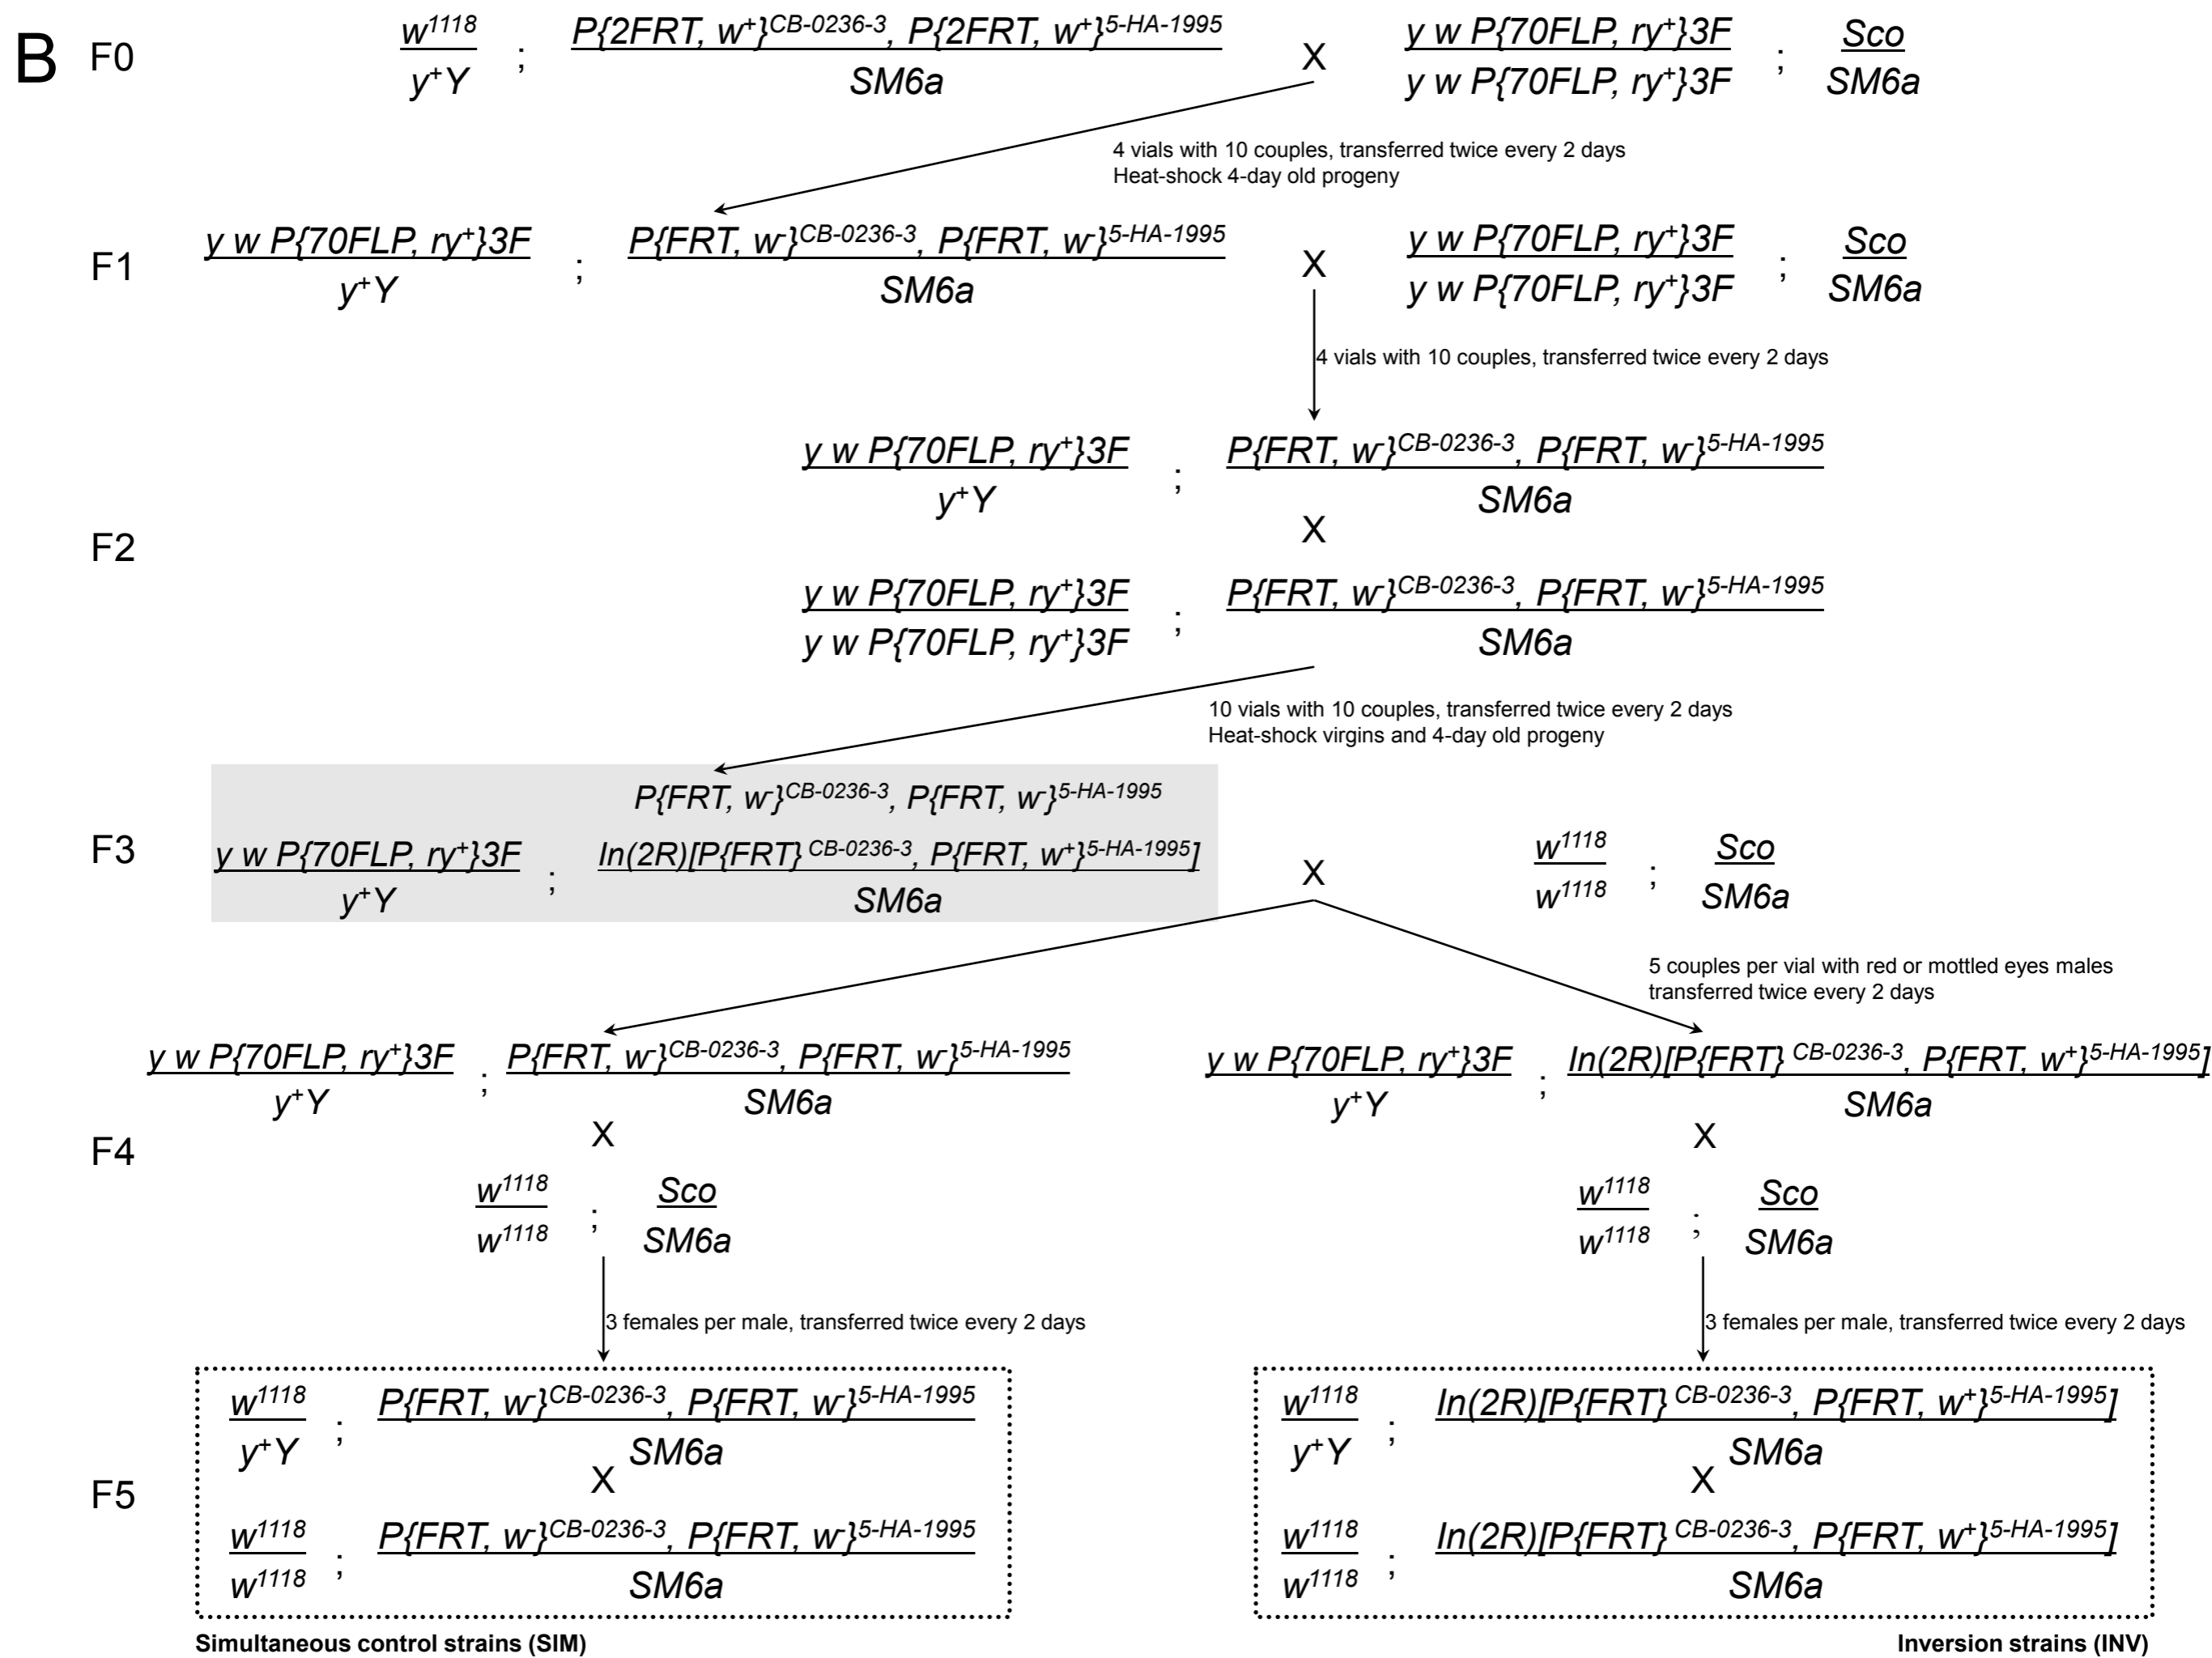

C

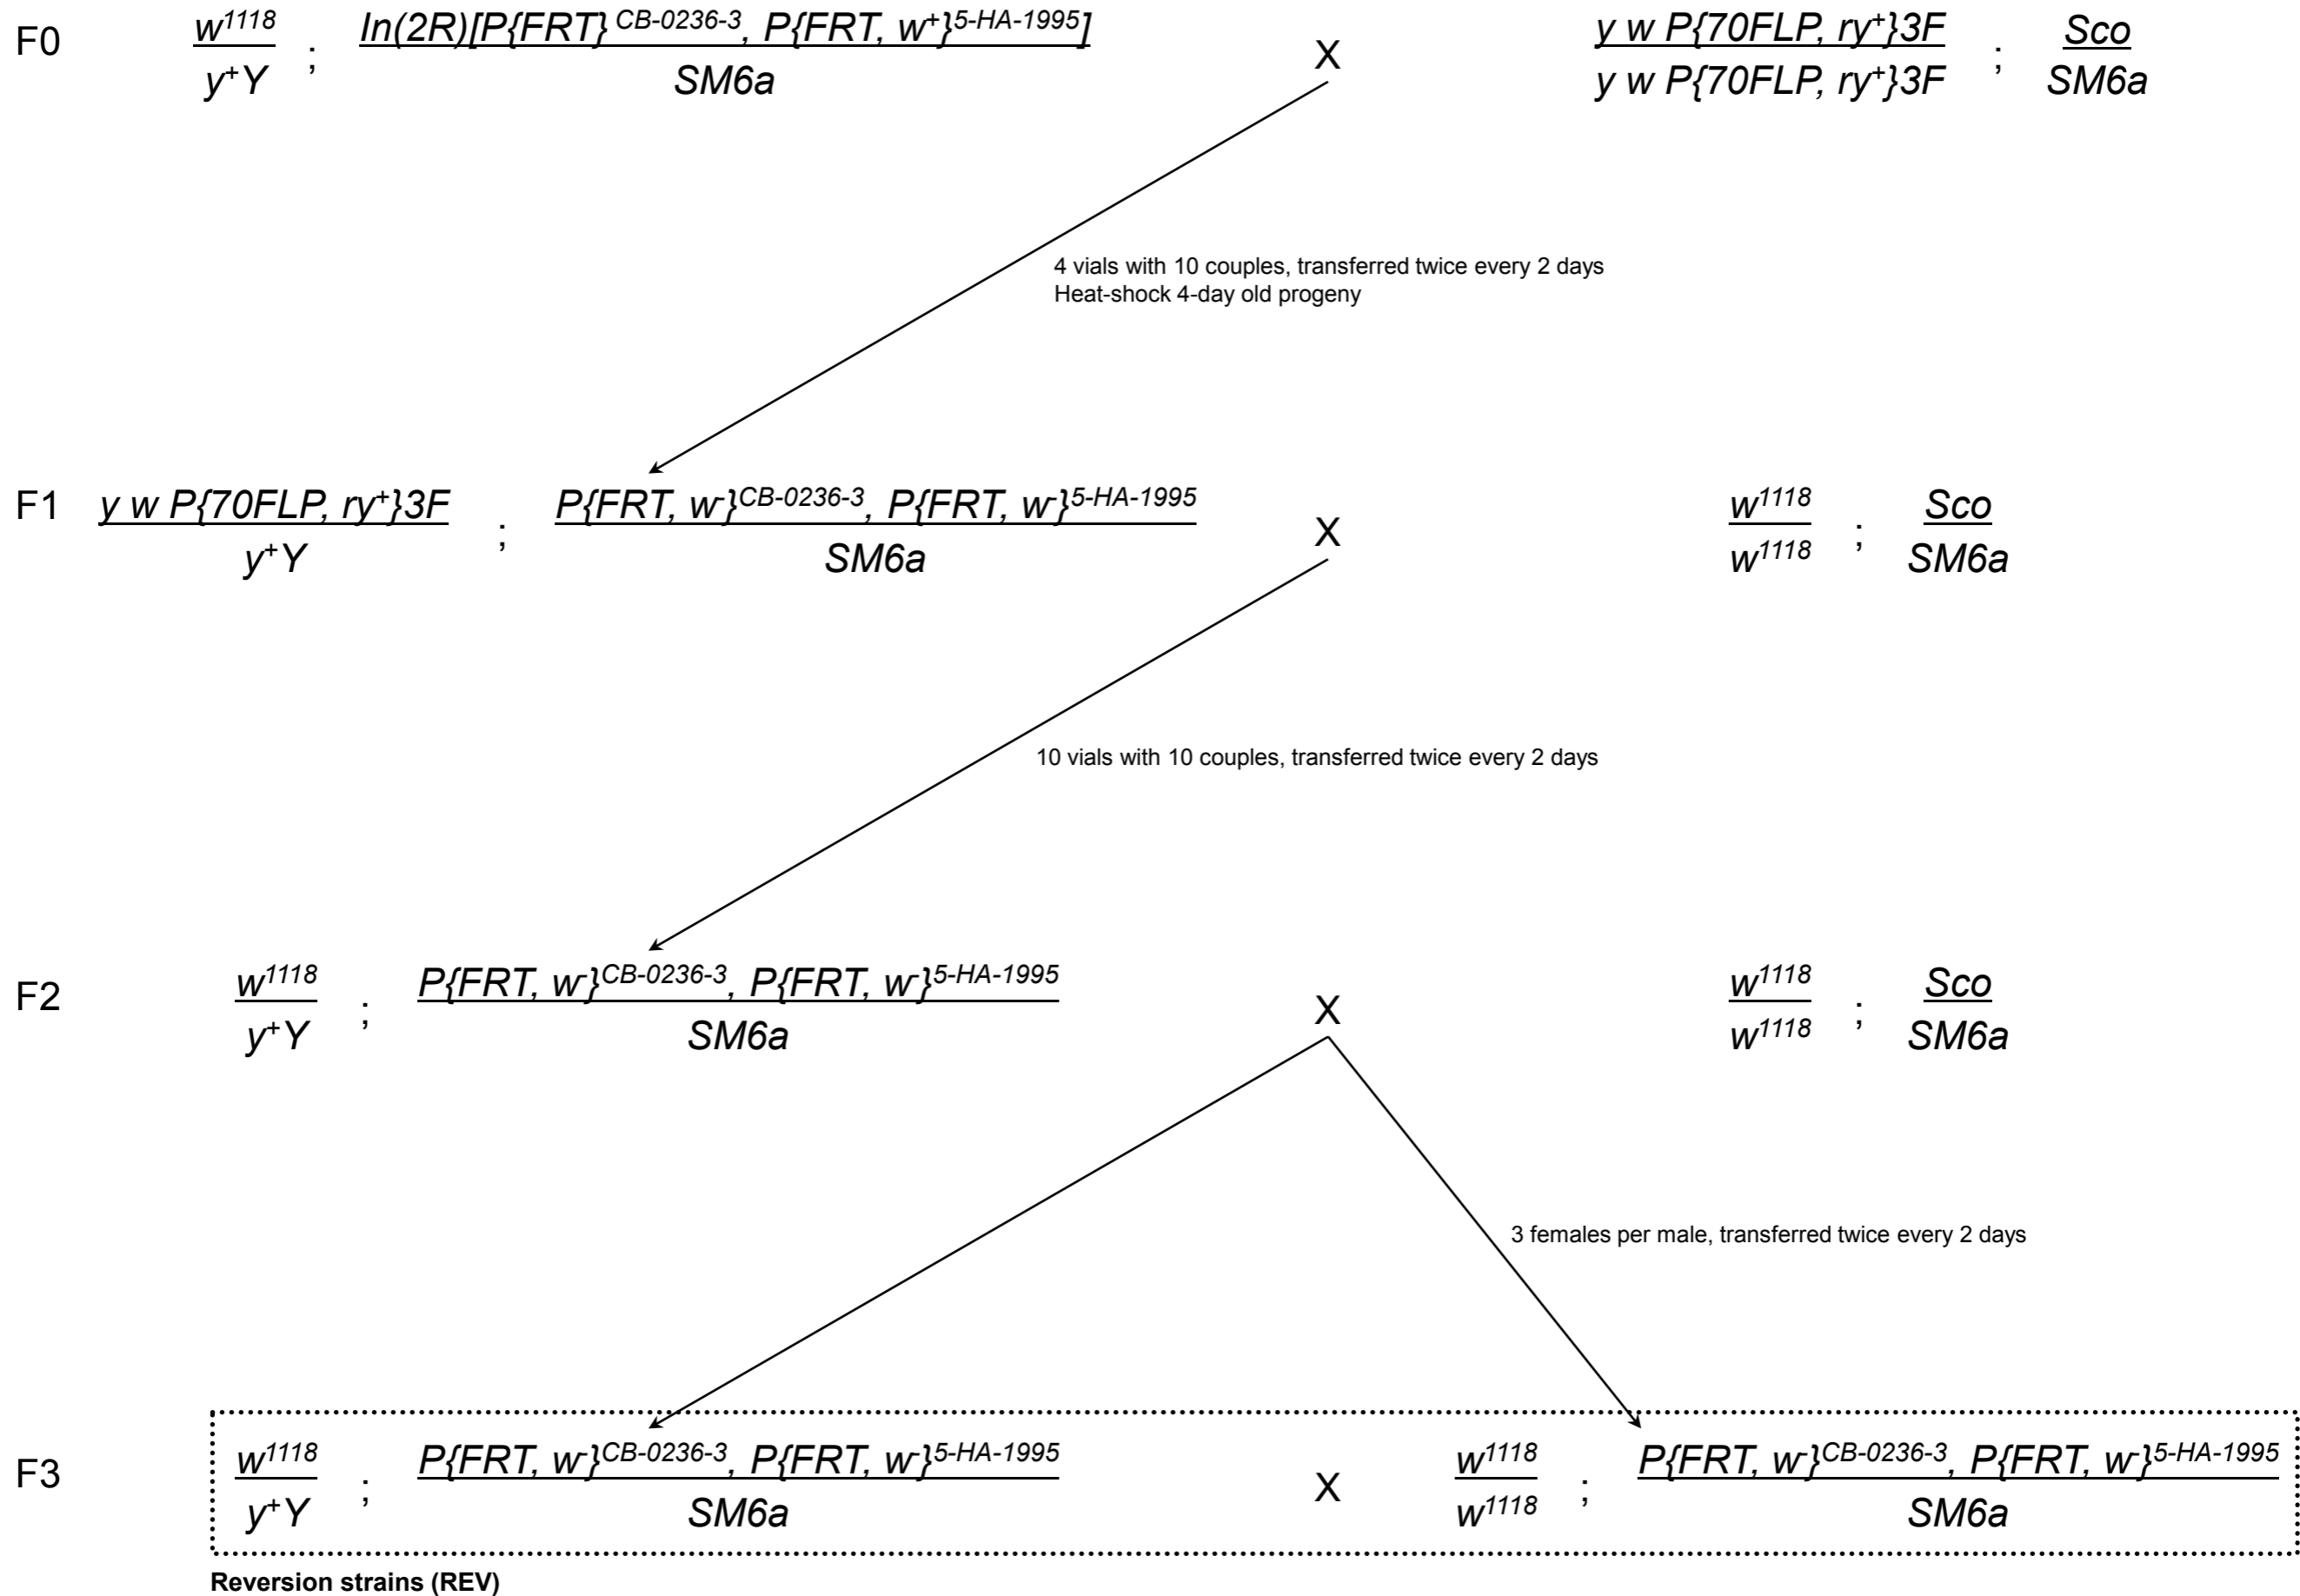

Supplement: pgen.1002475.s006.pdf [file pgen.1002475.s006.pdf]
