# Supplementary material for: Evaluation of the Role of Functional Constraints on the Integrity of an Ultraconserved Region in the Genus Drosophila
Source: PubMed Central journal article supplement (PMC3271063; doi:10.1371/journal.pgen.1002475), 2012-02-02
Supplement: pgen.1002475.s011.pdf [file pgen.1002475.s011.pdf]

Genomic alignment tracks for a region of DNA. The tracks include reference sequences (w1118 (A), 5-HA-1995 (A), CB-0236-3 (C)) and various derivative lines (REC, INV, SIM, REV) for both C and D strains. The DNA sequence is shown in a grid format with nucleotide positions (1-1600) indicated at the top. The reference sequence is shown in a light gray background, and the alignment tracks are shown in a white background with black text. The tracks are labeled on the left side of the grid. The sequence is shown in a grid format with nucleotide positions (1-1600) indicated at the top. The reference sequence is shown in a light gray background, and the alignment tracks are shown in a white background with black text. The tracks are labeled on the left side of the grid.
