# Supplementary material for: Evaluation of the Role of Functional Constraints on the Integrity of an Ultraconserved Region in the Genus Drosophila
Source: PubMed Central journal article supplement (PMC3271063; doi:10.1371/journal.pgen.1002475), 2012-02-02
Supplement: pgen.1002475.s021.pdf [file pgen.1002475.s021.pdf]

**Table S2. Protein-coding genes present in the ultraconserved region *CG15121-CG16894***

| Code <sup>a</sup> | Gene <sup>b</sup> | Cross-Mapped <sup>c</sup> | FlyAtlas <sup>d</sup> |            | SEBIDA                      | Male-Biased                       | Sperm                 | Seminal Fluid         | Chemosensory            |
|-------------------|-------------------|---------------------------|-----------------------|------------|-----------------------------|-----------------------------------|-----------------------|-----------------------|-------------------------|
|                   |                   |                           | Expression            | Enrichment | Classification <sup>e</sup> | Gene Expression <sup>f</sup>      | Proteome <sup>g</sup> | Proteome <sup>h</sup> | Perception <sup>i</sup> |
| 20                | <i>CG11218</i>    | ✓                         | bhcztwgg              |            | Male                        | mel, sim, yak                     |                       |                       | <i>Obp56d</i>           |
| 21                | <i>CG8462</i>     | ✓                         | hczaw                 |            | Female                      |                                   |                       | mel, sim, yak         | <i>Obp56e</i>           |
| 22                | <i>CG30450</i>    |                           | a                     | a          | Male                        |                                   |                       | mel, sim, yak         | <i>Obp56f</i>           |
| 23                | <i>CG8517</i>     | ✓                         | tay                   | t          | Male                        | mel, sim, yak, ana, pse, moj      |                       |                       |                         |
| 24                | <i>CG12501</i>    | ✓                         |                       |            | Unclassified                |                                   |                       |                       | <i>Or56a</i>            |
| 25                | <i>CG13873</i>    | ✓                         | haw                   |            | Male                        | mel, sim, yak, ana, pse           |                       | mel, sim, yak         | <i>Obp56g</i>           |
| 26                | <i>CG13874</i>    | ✓                         | h                     | h          | Unbiased (male)             | sim, yak, vir, moj                |                       |                       | <i>Obp56h</i>           |
| 27                | <i>CG8595</i>     | ✓                         |                       |            | Male                        |                                   |                       |                       |                         |
| 28                | <i>CG30448</i>    |                           | ta                    | a          | Male                        |                                   |                       | mel, sim, yak         | <i>Obp56i</i>           |
| 29                | <i>CG13872</i>    | ✓                         | t                     | t          | Male                        | yak, ana, pse, vir, moj           |                       |                       |                         |
| 30                | <i>CG30447</i>    |                           | ty                    | t          | Male                        |                                   |                       |                       |                         |
| 31                | <i>CG10822</i>    |                           | ty                    | t          | Male                        |                                   |                       |                       |                         |
| 32                | <i>CG8654</i>     | ✓                         | hcztxywgs             |            | Male                        | ana, pse, moj                     |                       |                       |                         |
| 33                | <i>CG16898</i>    |                           | hmztxw                | m          | Male                        |                                   |                       |                       |                         |
| 34                | <i>CG8896</i>     | ✓                         | bhcmzotaxywgs         |            | Unbiased (female)           |                                   |                       |                       |                         |
| 35                | <i>CG11041</i>    | ✓                         |                       |            | Unbiased (female)           |                                   |                       |                       |                         |
| 36                | <i>CG16894</i>    | ✓                         | ty                    | t          | Male                        | mel, sim, yak, ana, pse, vir, moj |                       |                       |                         |

<sup>a</sup> As in Figure 1.

<sup>b</sup> FlyBase [1].

<sup>c</sup> Inferred to be present within this ultraconserved region prior to the divergence of the lineages that lead to the *Sophophora* and *Drosophila* subgenera [2].

<sup>d</sup> Tissues with evidence of expression [3] (brain, b; carcass, w; crop, c; head, h; hindgut, z; larval fat body, y; larval Malpighian tubule, x; male accessory gland, a; midgut, m; ovary, o; salivary gland, s; testis, t; and thoracic abdominal ganglion, g) and preferential expression (five-fold increase in relation to the whole body) as estimated previously [2].

<sup>e</sup> Consensus categorization of the sex bias in mRNA abundance based on a reanalysis of several expression datasets [4]. The trend is indicated in parentheses for those cases in which no statistically significant bias was found.

<sup>f</sup> As categorized based on species-specific microarray experiments in *D. melanogaster -mel-*, *D. simulans -sim-*, *D. yakuba -yak-*, *D. ananassae -ana-*, *D. pseudoobscura -pse-*, *D. virilis -vir-*, and *D. mojavensis -moj-* [5].

<sup>g</sup> As assessed by whole-sperm mass spectroscopy in *D. melanogaster* [6].

<sup>h</sup> Species in which evidence of expression was found by mass spectroscopy in recently mated females [7].

<sup>i</sup> Common name as a member of a multigene family. Those encoding odorant-binding proteins are organized into two clusters: *Obp56a-Obp56f* and *Obp56g-Obp56i* [8].

### Supporting References

1. Tweedie S, Ashburner M, Falls K, Leyland P, McQuilton P, et al. (2009) FlyBase: enhancing *Drosophila* Gene Ontology annotations. *Nucleic Acids Res* 37: D555-559.
2. von Grotthuss M, Ashburner M, Ranz JM (2010) Fragile regions and not functional constraints predominate in shaping gene organization in the genus *Drosophila*. *Genome Res* 20: 1084-1096.
3. Chintapalli VR, Wang J, Dow JA (2007) Using FlyAtlas to identify better *Drosophila melanogaster* models of human disease. *Nat Genet* 39: 715-720.
4. Gnad F, Parsch J (2006) Sebida: a database for the functional and evolutionary analysis of genes with sex-biased expression. *Bioinformatics* 22: 2577-2579.
5. Zhang Y, Sturgill D, Parisi M, Kumar S, Oliver B (2007) Constraint and turnover in sex-biased gene expression in the genus *Drosophila*. *Nature* 450: 233-237.
6. Dorus S, Busby SA, Gerike U, Shabanowitz J, Hunt DF, et al. (2006) Genomic and functional evolution of the *Drosophila melanogaster* sperm proteome. *Nat Genet* 38: 1440-1445.
7. Findlay GD, Yi X, Maccoss MJ, Swanson WJ (2008) Proteomics reveals novel *Drosophila* seminal fluid proteins transferred at mating. *PLoS Biol* 6: e178.
8. Vieira FG, Sanchez-Gracia A, Rozas J (2007) Comparative genomic analysis of the odorant-binding protein family in 12 *Drosophila* genomes: purifying selection and birth-and-death evolution. *Genome Biol* 8: R235.
