# Supplementary material for: Evaluation of the Role of Functional Constraints on the Integrity of an Ultraconserved Region in the Genus Drosophila
Source: PubMed Central journal article supplement (PMC3271063; doi:10.1371/journal.pgen.1002475), 2012-02-02
Supplement: pgen.1002475.s022.pdf [file pgen.1002475.s022.pdf]

**Table S3. Comparative organization of the ultraconserved region *CG15121-CG16894* in *A. gambiae***

| <b>Protein-Coding Gene <sup>a</sup></b> | <b>Chromosome</b> | <b>Ensembl Gene ID</b> | <b>Coordinates (AgampP3)</b> |
|-----------------------------------------|-------------------|------------------------|------------------------------|
| <i>CG9218</i>                           | 3L                | AGAP012054             | 36975510..36983150           |
| <i>CG9854</i>                           | 2R                | AGAP013207             | 36911284..36914633           |
| <i>CG11025</i>                          | 2R                | AGAP002436             | 21377985..21379909           |
| <i>CG12501</i>                          | 3L                | AGAP011631             | 30452735..30454242           |
| <i>CG8595</i>                           | 3L                | AGAP012326             | 40293607..40297410           |
| <i>CG8654</i>                           | 2R                | AGAP003039             | 31351382..31364077           |

<sup>a</sup> Orthologues in *D. melanogaster* for which a one-to-one relationship exists [1].

### Supporting References

1. Haider S, Ballester B, Smedley D, Zhang J, Rice P, et al. (2009) BioMart Central Portal--unified access to biological data.

Nucleic Acids Res 37: W23-27.
