# Supplementary material for: Evaluation of the Role of Functional Constraints on the Integrity of an Ultraconserved Region in the Genus Drosophila
Source: PubMed Central journal article supplement (PMC3271063; doi:10.1371/journal.pgen.1002475), 2012-02-02
Supplement: pgen.1002475.s023.pdf [file pgen.1002475.s023.pdf]

**Table S4. Strains**

| Genotype                                                                                 | Abbreviated Name        | Cytological Description       |
|------------------------------------------------------------------------------------------|-------------------------|-------------------------------|
| <i>w<sup>1118</sup></i> ; 2 <i>iso</i> ; 3 <i>iso</i> <sup>a</sup>                       | <i>w<sup>1118</sup></i> | 2Rc—2Rt                       |
| <i>w<sup>1118</sup></i> ; <i>P{RS5}5-HA-1995</i> ; 3 <i>iso</i> <sup>b</sup>             | 5-HA-1995               | 2Rc—2Rt                       |
| <i>w<sup>1118</sup></i> ; <i>P{RS3}CB-0236-3</i> ; 3 <i>iso</i> <sup>b</sup>             | CB-0236-3               | 2Rc—2Rt                       |
| <i>w<sup>1118</sup></i> ; <i>Sco/SM6</i> ; 3 <i>iso</i> <sup>a</sup>                     | -                       | 2Rc—2Rt                       |
| <i>y w P{70FLP; ry+}3F; Sco/SM6</i> ; 3 <i>iso</i> <sup>a</sup>                          | -                       | 2Rc—2Rt                       |
| <i>w<sup>1118</sup></i> ; <i>P{RS3}CB-0236-3</i> , <i>P{RS5}5-HA-1995</i> <sup>c</sup>   | REC                     | 2Rc—2Rt                       |
| <i>w<sup>1118</sup></i> ; <i>P{RS3r}CB-0236-3</i> , <i>P{RS5r}5-HA-1995</i> <sup>c</sup> | SIM1, SIM2, SIM3        | 2Rc—2Rt                       |
| <i>w<sup>1118</sup></i> ; <i>In(2R)51F11-56E2</i> <sup>c</sup>                           | INV1, INV2              | 2Rc—51F11 56E2-51F11 56E2—2Rt |
| <i>w<sup>1118</sup></i> ; <i>P{RS3r}CB-0236-3</i> , <i>P{RS5r}5-HA-1995</i> <sup>c</sup> | REV1, REV2              | 2Rc—2Rt                       |

<sup>a</sup> Department of Genetics, University of Cambridge [1]. <sup>b</sup> Szeged *Drosophila* Stock Center. <sup>c</sup> Present work.

### Supporting References

1. Ryder E, Ashburner M, Bautista-Llacer R, Drummond J, Webster J, et al. (2007) The DrosDel deletion collection: a *Drosophila* genomewide chromosomal deficiency resource.

Genetics 177: 615-629.
