# Supplementary material for: Evaluation of the Role of Functional Constraints on the Integrity of an Ultraconserved Region in the Genus Drosophila
Source: PubMed Central journal article supplement (PMC3271063; doi:10.1371/journal.pgen.1002475), 2012-02-02
Supplement: pgen.1002475.s024.pdf [file pgen.1002475.s024.pdf]

**Table S5. Primers used**

| <b>Primer</b>        | <b>Sequence</b>          | <b>Location</b>                                |
|----------------------|--------------------------|------------------------------------------------|
| Plac1 <sup>a</sup>   | CACCCAAGGCTCTGCTCCCACAAT | <i>P</i> element 5' end, outwards orientation  |
| Pry4 <sup>a</sup>    | CAATCATATCGCTGTCTCACTCA  | <i>P</i> element 3' end, outwards orientation  |
| w11678U <sup>b</sup> | TCATCGCAGATCAGAAGCGG     | 3' exon of the reporter gene <i>mini-white</i> |
| CB-0236-3up          | ACACGCCGCAAGATGAATAC     | 2R:11260327..11260346 (+)                      |
| CB-0236-3down        | GATGACCAATTTCCGTTTGG     | 2R:11261115..11261096 (-)                      |
| 5-HA-1995up          | AAATTTTTCTGCCTCGCAAA     | 2R:15613845..15613864 (+)                      |
| 5-HA-1995down        | TCGAGTGGAATGAGTTGTGG     | 2R:15614470..15614451 (-)                      |

<sup>a</sup> <http://www.fruitfly.org/about/methods/inverse.pcr.html>. <sup>b</sup> [1].

### Supporting References

1. Golic KG, Golic MM (1996) Engineering the *Drosophila* genome: chromosome rearrangements by design. *Genetics* 144: 1693-1711.
