# Supplementary material for: Evaluation of the Role of Functional Constraints on the Integrity of an Ultraconserved Region in the Genus Drosophila
Source: PubMed Central journal article supplement (PMC3271063; doi:10.1371/journal.pgen.1002475), 2012-02-02
Supplement: pgen.1002475.s025.pdf [file pgen.1002475.s025.pdf]

**Table S6. Amplicons used to confirm the molecular organization of the genomic regions corresponding to the breakpoints of the inversion *In(2R)51F11-56E2***

| <b>Amplicon</b> <sup>a</sup> | <b>Primers</b>              | <b>Size (nt)</b> | <b>Purpose</b>                                                                                                                      |
|------------------------------|-----------------------------|------------------|-------------------------------------------------------------------------------------------------------------------------------------|
| A <sup>b</sup>               | CB-0236-3up / CB-0236-3down | ~700             | Verification of flanking sequence at the outer breakpoint in strains <i>w<sup>1118</sup></i> and 5-HA-1995                          |
| B <sup>b</sup>               | 5-HA-1995up / 5-HA-1995down | ~600             | Verification of flanking sequence at the inner breakpoint in strains <i>w<sup>1118</sup></i> and CB-0236-3                          |
| C <sup>b</sup>               | CB-0236-3up / Plac1         | ~600             | Verification of upstream flanking sequence to <i>P{RS3}CB-0236-3</i> and its derivatives                                            |
| D <sup>b</sup>               | Pry4 / CB-0236-3down        | ~500             | Verification of downstream flanking sequence to <i>P{RS3}CB-0236-3</i> and its derivatives                                          |
| E <sup>b</sup>               | 5-HA-1995up / Plac1         | ~600             | Verification of upstream flanking sequence to <i>P{RS5}5-HA-1995</i> and its derivatives                                            |
| F <sup>b</sup>               | Pry4 / 5-HA-1995down        | ~300             | Verification of downstream flanking sequence to <i>P{RS5}5-HA-1995</i> and its derivatives                                          |
| G <sup>c</sup>               | CB-0236-3up / w11678U       | ~3,400           | Diagnostic presence of a reporter gene mini- <i>white</i> with two exons at the outer breakpoint in strains CB-0236-3 and REC       |
| G' <sup>c</sup>              | CB-0236-3up / w11678U       | ~2,100           | Diagnostic presence of a reporter gene mini- <i>white</i> with one exon in strains SIM and REV                                      |
| H <sup>c</sup>               | w11678U / 5-HA-1995down     | ~2,600           | Diagnostic presence of a reporter gene mini- <i>white</i> with two exons at the inner breakpoint in strains 5-HA-1995, REC, and INV |

<sup>a</sup>Figure S5 for physical location. <sup>b</sup> Amplified with Takara Taq. <sup>c</sup> Amplified with Takara Ex Taq.
