# Supplementary material for: Evaluation of the Role of Functional Constraints on the Integrity of an Ultraconserved Region in the Genus Drosophila
Source: PubMed Central journal article supplement (PMC3271063; doi:10.1371/journal.pgen.1002475), 2012-02-02
Supplement: pgen.1002475.s026.pdf [file pgen.1002475.s026.pdf]

**Table S7. Test for differences in progeny size among the strains generated in the course of the experiments using homozygous crosses**

| Strain | Progeny Size <sup>a</sup>   | <i>P</i> <sup>b</sup> |        |        |        |        |        |        |
|--------|-----------------------------|-----------------------|--------|--------|--------|--------|--------|--------|
|        |                             | INV2                  | REC    | SIM1   | SIM2   | SIM3   | REV1   | REV2   |
| INV1   | 405.400, (345.635, 465.165) | 0.9999                | 0.9156 | 0.9818 | 1.0000 | 0.9156 | 0.8276 | 0.9156 |
| INV2   | 375.200, (281.541, 468.859) |                       | 0.7061 | 1.0000 | 0.9911 | 1.0000 | 1.0000 | 1.0000 |
| REC    | 456.400, (346.495, 566.305) |                       |        | 0.9156 | 0.9911 | 0.7061 | 0.7061 | 0.8276 |
| SIM1   | 379.400, (322.523, 436.277) |                       |        |        | 0.9156 | 0.9911 | 0.9999 | 0.9985 |
| SIM2   | 412.200, (345.436, 478.964) |                       |        |        |        | 0.7061 | 0.9156 | 0.8276 |
| SIM3   | 343.600, (280.041, 407.159) |                       |        |        |        |        | 1.0000 | 1.0000 |
| REV1   | 363.600, (287.998, 439.202) |                       |        |        |        |        |        | 1.0000 |
| REV2   | 359.600, (308.333, 410.867) |                       |        |        |        |        |        |        |

<sup>a</sup> Mean, 95% CI (lower boundary, upper boundary). <sup>b</sup> According to Steel-Dwass test. *n* = 5 across strains.
