# Supplementary material for: Evaluation of the Role of Functional Constraints on the Integrity of an Ultraconserved Region in the Genus Drosophila
Source: PubMed Central journal article supplement (PMC3271063; doi:10.1371/journal.pgen.1002475), 2012-02-02
Supplement: pgen.1002475.s027.pdf [file pgen.1002475.s027.pdf]

**Table S8. Test for differences in sex ratio among the strains generated in the course of the experiments using homozygous crosses**

| Strain | Sex Ratio <sup>a</sup>   | <i>P</i> <sup>b</sup> |        |        |        |        |        |        |
|--------|--------------------------|-----------------------|--------|--------|--------|--------|--------|--------|
|        |                          | INV2                  | REC    | SIM1   | SIM2   | SIM3   | REV1   | REV2   |
| INV1   | -0.075, (-0.200, 0.050)  | 0.9999                | 0.9676 | 0.9999 | 1.0000 | 0.7061 | 1.0000 | 0.8276 |
| INV2   | -0.056, (-0.181, 0.069)  |                       | 0.9985 | 1.0000 | 1.0000 | 1.0000 | 1.0000 | 0.7061 |
| REC    | 0.029, (-0.096, 0.153)   |                       |        | 0.9676 | 0.9911 | 1.0000 | 0.9676 | 0.1924 |
| SIM1   | -0.044, (-0.169, 0.081)  |                       |        |        | 1.0000 | 0.9156 | 0.9999 | 0.5647 |
| SIM2   | -0.049, (-0.174, 0.076)  |                       |        |        |        | 0.9911 | 1.0000 | 0.4220 |
| SIM3   | 0.055, (-0.070, 0.180)   |                       |        |        |        |        | 0.7061 | 0.1924 |
| REV1   | -0.062, (-0.187, 0.063)  |                       |        |        |        |        |        | 0.4220 |
| REV2   | -0.280, (-0.405, -0.155) |                       |        |        |        |        |        |        |

<sup>a</sup> Mean of log<sub>2</sub> values, 95% CI (lower boundary, upper boundary). <sup>b</sup> According to Steel-Dwass test. *n* = 5 across strains.
