# Supplementary material for: Evaluation of the Role of Functional Constraints on the Integrity of an Ultraconserved Region in the Genus Drosophila
Source: PubMed Central journal article supplement (PMC3271063; doi:10.1371/journal.pgen.1002475), 2012-02-02
Supplement: pgen.1002475.s028.pdf [file pgen.1002475.s028.pdf]

**Table S9. Evaluation of the effect of the disrupted ultraconserved region *CG15121-CG16894* in heterozygosis on a variety of traits**

| <b>Trait</b>                         | <b>Contrast</b>   | <b><i>n</i></b> | <b>Statistical Test</b> | <b>D.F.</b> | <b><i>P</i></b> |
|--------------------------------------|-------------------|-----------------|-------------------------|-------------|-----------------|
| Progeny size <sup>a</sup>            |                   |                 |                         |             |                 |
| <i>Females</i>                       | INV-1, INV-2, REC | 10-15           | ANOVA                   | 2, 32       | 0.1053          |
| <i>Males</i>                         | INV-1, INV-2, REC | 10-15           | ANOVA                   | 2, 32       | 0.3556          |
| <i>Total</i>                         | INV-1, INV-2, REC | 10-15           | ANOVA <sup>c</sup>      | 2, 19.52    | 0.1301          |
| Female to male ratio <sup>a, b</sup> | INV-1, INV-2, REC | 10-15           | ANOVA                   | 2, 32       | 0.1111          |
| Mendelian ratios (1:2:1)             |                   |                 |                         |             |                 |
| <i>Females</i>                       | REC/SIM1          | 5               | <i>G</i> -test          | 2           | 0.1691          |
|                                      | INV1/SIM1         | 5               | <i>G</i> -test          | 2           | 0.8908          |
|                                      | INV2/SIM1         | 5               | <i>G</i> -test          | 2           | 0.1026          |
|                                      | REC/REV1          | 5               | <i>G</i> -test          | 2           | 0.5663          |
|                                      | INV1/REV1         | 5               | <i>G</i> -test          | 2           | 0.3147          |
|                                      | REC/REV2          | 5               | <i>G</i> -test          | 2           | 0.5233          |
| <i>Males</i>                         | INV2/REV2         | 5               | <i>G</i> -test          | 2           | 0.8822          |
|                                      | REC/SIM1          | 5               | <i>G</i> -test          | 2           | 0.8969          |
|                                      | INV1/SIM1         | 5               | <i>G</i> -test          | 2           | 0.8635          |
|                                      | INV2/SIM1         | 5               | <i>G</i> -test          | 2           | 0.2068          |
|                                      | REC/REV1          | 5               | <i>G</i> -test          | 2           | 0.6153          |
|                                      | INV1/REV1         | 5               | <i>G</i> -test          | 2           | 0.6434          |
| <i>Total</i>                         | REC/REV2          | 5               | <i>G</i> -test          | 2           | 0.2708          |
|                                      | INV2/REV2         | 5               | <i>G</i> -test          | 2           | 0.1055          |
|                                      | REC/SIM1          | 5               | <i>G</i> -test          | 2           | 0.2719          |
|                                      | INV1/SIM1         | 5               | <i>G</i> -test          | 2           | 0.8321          |
|                                      | INV2/SIM1         | 5               | <i>G</i> -test          | 2           | 0.0908          |
|                                      | REC/REV1          | 5               | <i>G</i> -test          | 2           | 0.7035          |
| <i>Total</i>                         | INV1/REV1         | 5               | <i>G</i> -test          | 2           | 0.6829          |
|                                      | REC/REV2          | 5               | <i>G</i> -test          | 2           | 0.1723          |
|                                      | INV2/REV2         | 5               | <i>G</i> -test          | 2           | 0.2331          |

<sup>a</sup> Upon pooling the data from the various genetic backgrounds in which the chromosomes tested (REC, INV1, INV2) were in heterozygosis (SIM1, REV1, and REV2). <sup>b</sup> Upon log transformation. <sup>c</sup> Welch's ANOVA.
