# Supplementary material for: Evaluation of the Role of Functional Constraints on the Integrity of an Ultraconserved Region in the Genus Drosophila
Source: PubMed Central journal article supplement (PMC3271063; doi:10.1371/journal.pgen.1002475), 2012-02-02
Supplement: pgen.1002475.s029.pdf [file pgen.1002475.s029.pdf]

**Table S10. Evaluation of the effect of the disrupted ultraconserved region *CG15121-CG16894* on relative viability in competition experiments prior to imago emergence**

| Starting                |                        | Tested     |                        |                                 | Contrast    |                               |          |
|-------------------------|------------------------|------------|------------------------|---------------------------------|-------------|-------------------------------|----------|
| Proportion <sup>a</sup> | Experiment             | Chromosome | Condition <sup>b</sup> | Relative Viability <sup>c</sup> | Chromosomes | Statistical Test <sup>d</sup> | <i>P</i> |
| <i>1:3</i>              | SIM1/SIM1 vs REC/SIM1  | REC        | Het                    | 0.578, (0.141, 0.843)           | REC, INV1   | Tukey-Kramer HSD              | <0.0001  |
|                         | SIM1/SIM1 vs INV1/SIM1 | INV1       | Het                    | 1.445, (0.227, 0.929)           | REC, INV2   | Tukey-Kramer HSD              | 0.9329   |
|                         | SIM1/SIM1 vs INV2/SIM1 | INV2       | Het                    | -0.600, (-1.818, -1.116)        | INV1, INV2  | Tukey-Kramer HSD              | <0.0001  |
|                         | SIM1/SIM1 vs REC/REC   | REC        | Hom                    | 0.041, (-0.230, 0.312)          | REC, INV1   | Tukey-Kramer HSD              | 1        |
|                         | SIM1/SIM1 vs INV1/INV1 | INV1       | Hom                    | 0.040, (-0.231, 0.311)          | REC, INV2   | Tukey-Kramer HSD              | 0.0051   |
|                         | SIM1/SIM1 vs INV2/INV2 | INV2       | Hom                    | 0.685, (0.414, 0.956)           | INV1, INV2  | Tukey-Kramer HSD              | 0.0051   |
|                         | REV1/REV1 vs REC/REV1  | REC        | Het                    | -0.512, (-0.892, -0.132)        | REC, INV1   | <i>t</i> -test                | 0.2341   |
|                         | REV1/REV1 vs INV1/REV1 | INV1       | Het                    | -0.827, (-1.207, -0.447)        |             |                               |          |
|                         | REV1/REV1 vs REC/REC   | REC        | Hom                    | 0.892, (0.696, 1.088)           | REC, INV1   | <i>t</i> -test                | 0.0002   |
|                         | REV1/REV1 vs INV1/INV1 | INV1       | Hom                    | 0.288, (0.092, 0.484)           |             |                               |          |
|                         | REV2/REV2 vs REC/REV2  | REC        | Het                    | 0.583, (0.267, 0.899)           | REC, INV2   | <i>t</i> -test                | 0.1003   |
|                         | REV2/REV2 vs INV2/REV2 | INV2       | Het                    | 0.952, (0.636, 1.268)           |             |                               |          |
|                         | REV2/REV2 vs REC/REC   | REC        | Hom                    | 0.257, (0.074, 0.441)           | REC, INV2   | <i>t</i> -test                | 0.3068   |
|                         | REV2/REV2 vs INV2/INV2 | INV2       | Hom                    | 0.387, (0.203, 0.571)           |             |                               |          |

**Table S10. Evaluation of the effect of the disrupted ultraconserved region *CG15121-CG16894* on relative viability in competition experiments prior to imago emergence**

| Starting                |                        | Tested     |                        |                                 | Contrast    |                               |          |
|-------------------------|------------------------|------------|------------------------|---------------------------------|-------------|-------------------------------|----------|
| Proportion <sup>a</sup> | Experiment             | Chromosome | Condition <sup>b</sup> | Relative Viability <sup>c</sup> | Chromosomes | Statistical Test <sup>d</sup> | <i>P</i> |
| <i>1:1</i>              | SIM1/SIM1 vs REC/SIM1  | REC        | Het                    | 0.484, (0.145, 0.823)           | REC, INV1   | Tukey-Kramer HSD              | 0.0014   |
|                         | SIM1/SIM1 vs INV1/SIM1 | INV1       | Het                    | -0.439, (-0.778, -0.100)        | REC, INV2   | Tukey-Kramer HSD              | 0.2483   |
|                         | SIM1/SIM1 vs INV2/SIM1 | INV2       | Het                    | 0.102, (-0.237, 0.441)          | INV1, INV2  | Tukey-Kramer HSD              | 0.0705   |
|                         | SIM1/SIM1 vs REC/REC   | REC        | Hom                    | 0.233, (-0.017, 0.483)          | REC, INV1   | Tukey-Kramer HSD              | 0.0035   |
|                         | SIM1/SIM1 vs INV1/INV1 | INV1       | Hom                    | -0.213, (-0.463, 0.037)         | REC, INV2   | Tukey-Kramer HSD              | 0.0035   |
|                         | SIM1/SIM1 vs INV2/INV2 | INV2       | Hom                    | 0.853, (0.603, 1.103)           | INV1, INV2  | Tukey-Kramer HSD              | <0.0001  |
|                         | REV1/REV1 vs REC/REV1  | REC        | Het                    | -0.412, (-0.642, -0.182)        | REC, INV1   | <i>t</i> -test                | 0.0208   |
|                         | REV1/REV1 vs INV1/REV1 | INV1       | Het                    | 0.805, (-1.035, -0.575)         |             |                               |          |
|                         | REV1/REV1 vs REC/REC   | REC        | Hom                    | 0.715, (0.336, 1.094)           | REC, INV1   | <i>t</i> -test                | 0.1027   |
|                         | REV1/REV1 vs INV1/INV1 | INV1       | Hom                    | 0.276, (-0.103, 0.655)          |             |                               |          |
|                         | REV2/REV2 vs REC/REV2  | REC        | Het                    | 0.547, (0.305, 0.789)           | REC, INV2   | <i>t</i> -test                | 0.0747   |
|                         | REV2/REV2 vs INV2/REV2 | INV2       | Het                    | 0.855, (0.613, 1.097)           |             |                               |          |
|                         | REV2/REV2 vs REC/REC   | REC        | Hom                    | 0.337, (0.084, 0.590)           | REC, INV2   | <i>t</i> -test                | 0.1436   |
|                         | REV2/REV2 vs INV2/INV2 | INV2       | Hom                    | 0.597, (0.344, 0.850)           |             |                               |          |

**Table S10. Evaluation of the effect of the disrupted ultraconserved region *CG15121-CG16894* on relative viability in competition experiments prior to imago emergence**

| Starting                |                        | Tested     |                        |                                 | Contrast    |                               |          |
|-------------------------|------------------------|------------|------------------------|---------------------------------|-------------|-------------------------------|----------|
| Proportion <sup>a</sup> | Experiment             | Chromosome | Condition <sup>b</sup> | Relative Viability <sup>c</sup> | Chromosomes | Statistical Test <sup>d</sup> | <i>P</i> |
| 3:1                     | SIM1/SIM1 vs REC/SIM1  | REC        | Het                    | 0.527, (0.267, 0787)            | REC, INV1   | Tukey-Kramer HSD              | 0.0010   |
|                         | SIM1/SIM1 vs INV1/SIM1 | INV1       | Het                    | -0.204, (-0.464, 0.056)         | REC, INV2   | Tukey-Kramer HSD              | 0.1185   |
|                         | SIM1/SIM1 vs INV2/SIM1 | INV2       | Het                    | 0.159, (-0.101, 0.419)          | INV1, INV2  | Tukey-Kramer HSD              | 0.1249   |
|                         | SIM1/SIM1 vs REC/REC   | REC        | Hom                    | 0.310, (0.072, 0.549)           | REC, INV1   | Tukey-Kramer HSD              | 0.8891   |
|                         | SIM1/SIM1 vs INV1/INV1 | INV1       | Hom                    | 0.234, (-0.004, 0.472)          | REC, INV2   | Tukey-Kramer HSD              | 0.0006   |
|                         | SIM1/SIM1 vs INV2/INV2 | INV2       | Hom                    | 1.016, (0.778, 1.254)           | INV1, INV2  | Tukey-Kramer HSD              | 0.0002   |
|                         | REV1/REV1 vs REC/REV1  | REC        | Het                    | -0.610, (-1.067, -0.645)        | REC, INV1   | <i>t</i> -test                | 0.0983   |
|                         | REV1/REV1 vs INV1/REV1 | INV1       | Het                    | -0.857, (-0.820, -0.400)        |             |                               |          |
|                         | REV1/REV1 vs REC/REC   | REC        | Hom                    | 0.715, (0.452, 0.978)           | REC, INV1   | <i>t</i> -test                | 0.0026   |
|                         | REV1/REV1 vs INV1/INV1 | INV1       | Hom                    | 0.097, (-0.166, 0.360)          |             |                               |          |
|                         | REV2/REV2 vs REC/REV2  | REC        | Het                    | -0.255, (0.740, 1.312)          | REC, INV2   | <i>t</i> -test                | <0.0001  |
|                         | REV2/REV2 vs INV2/REV2 | INV2       | Het                    | 1.026, (-0.541, 0.031)          |             |                               |          |
|                         | REV2/REV2 vs REC/REC   | REC        | Hom                    | 0.051, (-0.142, 0.244)          | REC, INV2   | <i>t</i> -test                | 0.0022   |
|                         | REV2/REV2 vs INV2/INV2 | INV2       | Hom                    | 0.514, (0.321, 0707)            |             |                               |          |

<sup>a</sup> Tester embryo : embryo carrying the tested chromosome. <sup>b</sup> Het, heterozygosis; Hom, homozygosis. <sup>c</sup> Mean, 95% CI (lower boundary, upper boundary). <sup>d</sup> In the case of *t*-tests, d.f. = 18. Relative viabilities were log2-transformed. *n* = 10 for all experiments.
