# Supplementary material for: Evaluation of the Role of Functional Constraints on the Integrity of an Ultraconserved Region in the Genus Drosophila
Source: PubMed Central journal article supplement (PMC3271063; doi:10.1371/journal.pgen.1002475), 2012-02-02
Supplement: pgen.1002475.s030.pdf [file pgen.1002475.s030.pdf]

**Table S11. Fertility of males carrying the ultraconserved region *CG15121-CG1689* in its disrupted or intact form**

| Tested Chromosome | Progeny Size <sup>a</sup> | Contrast <sup>b</sup> |          |
|-------------------|---------------------------|-----------------------|----------|
|                   |                           | Chromosomes           | <i>P</i> |
| REC               | 115.680, (98.84, 132.52)  | REC, INV1             | 0.4200   |
| INV1              | 102.813, (81.77, 123.86)  | REC, INV2             | 0.2616   |
| INV2              | 133.333, (113.49, 153.18) | INV1, INV2            | 0.0215   |

<sup>a</sup> Mean, 95% CI (lower boundary, upper boundary). <sup>b</sup> According to the Steel-Dwass test. *n* = 10 for each tested chromosome.
