# Supplementary material for: Evaluation of the Role of Functional Constraints on the Integrity of an Ultraconserved Region in the Genus Drosophila
Source: PubMed Central journal article supplement (PMC3271063; doi:10.1371/journal.pgen.1002475), 2012-02-02
Supplement: pgen.1002475.s031.pdf [file pgen.1002475.s031.pdf]

**Table S12. Sperm competence of males carrying the ultraconserved region *CG15121-CG1689* in its disrupted or intact form in double mating experiments**

| <b>Mating Experiment</b> | <b>Tested Chromosome</b> | <b><i>n</i></b> | <b>Fraction of <i>w</i><sup>+</sup> offspring <sup>a</sup></b> |
|--------------------------|--------------------------|-----------------|----------------------------------------------------------------|
| Direct                   | REC                      | 22              | 0.410, (0.3032, 0.5168)                                        |
|                          | INV1                     | 10              | 0.422, (0.2636, 0.5804)                                        |
|                          | INV2                     | 14              | 0.451, (0.3168, 0.5846)                                        |
| Reciprocal               | REC                      | 25              | 0.614, (0.5196, 0.7084)                                        |
|                          | INV1                     | 16              | 0.573, (0.4552, 0.692)                                         |
|                          | INV2                     | 14              | 0.607, (0.4810, 0.7332)                                        |

<sup>a</sup> Mean, 95% CI (lower boundary, upper boundary).
