# Supplementary material for: Evaluation of the Role of Functional Constraints on the Integrity of an Ultraconserved Region in the Genus Drosophila
Source: PubMed Central journal article supplement (PMC3271063; doi:10.1371/journal.pgen.1002475), 2012-02-02
Supplement: pgen.1002475.s032.pdf [file pgen.1002475.s032.pdf]

**Table S13. Mating ability of flies carrying the ultraconserved region *CG15121-CGI689* in its disrupted or intact form in three different timeframes**

| <b>Timeframe</b> | <b>Tested Chromosome</b> | <b>Females Fertilized<sup>a</sup></b> |
|------------------|--------------------------|---------------------------------------|
| 1 h              | REC                      | 1.2, (0.6745, 1.7253)                 |
|                  | INV1                     | 1.5, (0.9745, 2.0253)                 |
|                  | INV2                     | 0.8, (0.2746, 1.3253)                 |
| 3 h              | REC                      | 1.9, (1.3717, 2.4283)                 |
|                  | INV1                     | 2.3, (1.7717, 2.8283)                 |
|                  | INV2                     | 2.1, (1.5717, 2.6283)                 |
| 6 h              | REC                      | 3.5, (2.539, 4.4361)                  |
|                  | INV1                     | 3.2, (2.2639, 4.1361)                 |
|                  | INV2                     | 3.3, (2.3639, 4.2361)                 |

<sup>a</sup> Mean, 95% CI (lower boundary, upper boundary).  $n = 10$  for each tested chromosome.
