# Supplementary material for: Evaluation of the Role of Functional Constraints on the Integrity of an Ultraconserved Region in the Genus Drosophila
Source: PubMed Central journal article supplement (PMC3271063; doi:10.1371/journal.pgen.1002475), 2012-02-02
Supplement: pgen.1002475.s033.pdf [file pgen.1002475.s033.pdf]

**Table S14. Response of flies carrying the ultraconserved region *CG15121-CG1689* in its disrupted or intact form to a variety of volatile compounds**

| Volatile<br>Compound       | Tested<br>Chromosome | Avoidance Score <sup>a</sup> | Contrast <sup>b</sup> |          |
|----------------------------|----------------------|------------------------------|-----------------------|----------|
|                            |                      |                              | Chromosomes           | <i>P</i> |
| Water                      |                      |                              |                       |          |
| <i>Females</i>             | REC                  | 1.75, (1.3637, 2.1363)       | REC, INV1             | 0.0241   |
|                            | INV1                 | 2.40, (2.1454, 2.6546)       | REC, INV2             | 0.0360   |
|                            | INV2                 | 2.39, (2.1130, 2.6670)       | INV1, INV2            | 1        |
| <i>Males</i>               | REC                  | 2.32, (1.9987, 2.6413)       | REC, INV1             | 0.9718   |
|                            | INV1                 | 2.49, (1.9173, 3.0627)       | REC, INV2             | 0.8163   |
|                            | INV2                 | 2.22, (1.8882, 2.5518)       | INV1, INV2            | 0.7942   |
| Ethanol 10 <sup>-3</sup>   |                      |                              |                       |          |
| <i>Females</i>             | REC                  | 1.21, (0.8033, 1.6167)       | REC, INV1             | 0.0191   |
|                            | INV1                 | 2.04, (1.6421, 2.4379)       | REC, INV2             | 0.0155   |
|                            | INV2                 | 1.98, (1.6587, 2.3013)       | INV1, INV2            | 1        |
| <i>Males</i>               | REC                  | 1.83, (1.4197, 2.2403)       | REC, INV1             | 0.0593   |
|                            | INV1                 | 1.13, (0.6196, 1.6404)       | REC, INV2             | 0.9874   |
|                            | INV2                 | 1.84, (1.3924, 2.2876)       | INV1, INV2            | 0.0331   |
| Ethanol 10 <sup>-0.5</sup> |                      |                              |                       |          |
| <i>Females</i>             | REC                  | 1.68, (1.2929, 2.0671)       | REC, INV1             | 0.1083   |
|                            | INV1                 | 2.14, (1.7295, 2.5505)       | REC, INV2             | 0.0267   |
|                            | INV2                 | 2.25, (1.9971, 2.5029)       | INV1, INV2            | 0.9616   |
| <i>Males</i>               | REC                  | 2.61, (2.2384, 2.9816)       | REC, INV1             | 0.3779   |
|                            | INV1                 | 2.22, (1.8100, 2.6300)       | REC, INV2             | 0.5819   |
|                            | INV2                 | 2.20, (1.5349, 2.8651)       | INV1, INV2            | 0.9874   |
| Acetone 10 <sup>-4.5</sup> |                      |                              |                       |          |
| <i>Females</i>             | REC                  | 1.89, (1.6535, 2.1365)       | REC, INV1             | 0.0007   |
|                            | INV1                 | 2.85, (2.5971, 3.1029)       | REC, INV2             | 0.1854   |
|                            | INV2                 | 2.22, (1.9658, 2.4742)       | INV1, INV2            | 0.0086   |

**Table S14. Response of flies carrying the ultraconserved region *CG15121-CG1689* in its disrupted or intact form to a variety of volatile compounds**

| Volatile<br>Compound            | Tested<br>Chromosome | Avoidance Score <sup>a</sup> | Contrast <sup>b</sup> |          |
|---------------------------------|----------------------|------------------------------|-----------------------|----------|
|                                 |                      |                              | Chromosomes           | <i>P</i> |
| <i>Males</i>                    | REC                  | 2.35, (2.0555, 2.6445)       | REC, INV1             | 0.0268   |
|                                 | INV1                 | 2.88, (2.6646, 3.0954)       | REC, INV2             | 0.0714   |
|                                 | INV2                 | 2.88, (2.4827, 3.2773)       | INV1, INV2            | 1        |
| Acetone 10 <sup>-1.5</sup>      |                      |                              |                       |          |
| <i>Females</i>                  | REC                  | 2.54, (2.1436, 2.9364)       | REC, INV1             | 0.4231   |
|                                 | INV1                 | 2.91, (2.4483, 3.3717)       | REC, INV2             | 0.9616   |
|                                 | INV2                 | 2.64, (2.1689, 3.1111)       | INV1, INV2            | 0.3389   |
| <i>Males</i>                    | REC                  | 3.13, (2.6627, 3.5973)       | REC, INV1             | 0.9968   |
|                                 | INV1                 | 2.97, (2.4942, 3.4458)       | REC, INV2             | 0.5144   |
|                                 | INV2                 | 2.80, (2.5099, 3.0901)       | INV1, INV2            | 0.4908   |
| Benzaldehyde 10 <sup>-3.5</sup> |                      |                              |                       |          |
| <i>Females</i>                  | REC                  | 2.33, (1.8185, 2.8415)       | REC, INV1             | 0.1704   |
|                                 | INV1                 | 2.66, (2.4384, 2.8816)       | REC, INV2             | 0.7495   |
|                                 | INV2                 | 2.43, (2.2867, 2.5733)       | INV1, INV2            | 0.2432   |
| <i>Males</i>                    | REC                  | 2.80, (2.3603, 3.2397)       | REC, INV1             | 0.9620   |
|                                 | INV1                 | 2.80, (2.1375, 3.4625)       | REC, INV2             | 0.1889   |
|                                 | INV2                 | 2.33, (1.9440, 2.7160)       | INV1, INV2            | 0.3807   |
| Benzaldehyde 10 <sup>-0.5</sup> |                      |                              |                       |          |
| <i>Females</i>                  | REC                  | 4.64, (4.1328, 5.1472)       | REC, INV1             | 0.5390   |
|                                 | INV1                 | 4.85, (4.7657, 4.9343)       | REC, INV2             | 0.4020   |
|                                 | INV2                 | 4.85, (4.7805, 4.9195)       | INV1, INV2            | 0.9991   |
| <i>Males</i>                    | REC                  | 4.85, (4.7059, 4.9941)       | REC, INV1             | 1        |
|                                 | INV1                 | 4.78, (4.4923, 5.0677)       | REC, INV2             | 0.4251   |
|                                 | INV2                 | 4.72, (4.5298, 4.9102)       | INV1, INV2            | 0.5217   |

<sup>a</sup> Mean, 95% CI (lower boundary, upper boundary). <sup>b</sup> According to the Steel-Dwass test. *n* = 10 for each volatile compound by sex combination assayed.
