# Supplementary material for: Evaluation of the Role of Functional Constraints on the Integrity of an Ultraconserved Region in the Genus Drosophila
Source: PubMed Central journal article supplement (PMC3271063; doi:10.1371/journal.pgen.1002475), 2012-02-02
Supplement: pgen.1002475.s034.pdf [file pgen.1002475.s034.pdf]

**Table S15. Performance of strains carrying the ultraconserved region *CG15121-CG1689* in its disrupted or intact form based on four proxies of global homeostasis**

| Proxy (Parameter Measured)                       | Strains <sup>a</sup>    |                         |                         |
|--------------------------------------------------|-------------------------|-------------------------|-------------------------|
|                                                  | REC                     | INV1                    | INV2                    |
| Negative gravitaxis (height reached)             |                         |                         |                         |
| <i>Females</i>                                   | 0.812, (0.677, 0.946)   | 0.844, (0.768, 0.920)   | 0.834, (0.753, 0.915)   |
| <i>Males</i>                                     | 0.772, (0.674, 0.870)   | 0.764, (0.672, 0.856)   | 0.716, (0.610, 0.821)   |
| Heat-shock resistance (fraction surviving flies) |                         |                         |                         |
| <i>Females</i>                                   | 0.880, (0.776, 0.984)   | 0.860, (0.667, 1.053)   | 0.700, (0.437, 0.96)    |
| <i>Males</i>                                     | 0.610, (0.499, 0.721)   | 0.700, (0.584, 0.816)   | 0.690, (0.518, 0.86)    |
| Desiccation resistance (time to death)           |                         |                         |                         |
| <i>Females</i>                                   | 17.15, (16.073, 18.227) | 16.95, (15.731, 18.169) | 17.10, (15.905, 18.295) |
| <i>Males</i>                                     | 12.75, (11.948, 13.552) | 13.05, (12.453, 13.647) | 13.05, (12.493, 13.607) |
| Starvation resistance (time to death)            |                         |                         |                         |
| <i>Females</i>                                   | 2.10, (1.905, 2.295)    | 2.175, (1.932, 2.418)   | 2.625, (2.496, 2.754)   |
| <i>Males</i>                                     | 2.17, (2.001, 2.349)    | 2.125, (2.021, 2.229)   | 2.175, (2.001, 2.349)   |

<sup>a</sup> Mean, 95% CI (lower boundary, upper boundary).  $n = 20$  for all proxies except for heat-shock ( $n = 5$ ).
