# Supplementary material for: Evaluation of the Role of Functional Constraints on the Integrity of an Ultraconserved Region in the Genus Drosophila
Source: PubMed Central journal article supplement (PMC3271063; doi:10.1371/journal.pgen.1002475), 2012-02-02
Supplement: pgen.1002475.s035.pdf [file pgen.1002475.s035.pdf]

**Table S16. Expression differences among strains using a one-way ANOVA at FDR 0.01**

|      | REC | INV1  | INV2  | SIM1  | REV1   | REV2   |
|------|-----|-------|-------|-------|--------|--------|
| REC  | -   | 0 / 2 | 0 / 9 | 2 / 5 | 2 / 14 | 2 / 44 |
| INV1 |     | -     | 0 / 3 | 2 / 7 | 6 / 11 | 2 / 11 |
| INV2 |     |       | -     | 2 / 8 | 3 / 5  | 2 / 5  |
| SIM1 |     |       |       | -     | 2 / 3  | 0 / 2  |
| REV1 |     |       |       |       | -      | 0 / 0  |
| REV2 |     |       |       |       |        | -      |

Males / females.
