# Supplementary material for: Evaluation of the Role of Functional Constraints on the Integrity of an Ultraconserved Region in the Genus Drosophila
Source: PubMed Central journal article supplement (PMC3271063; doi:10.1371/journal.pgen.1002475), 2012-02-02
Supplement: pgen.1002475.s036.pdf [file pgen.1002475.s036.pdf]

**Table S17. Expression differences detected in six planned contrasts using one-way ANOVA at FDR 0.01**

| <b>Planned Contrast</b>                         | <b>Males</b> | <b>Females</b> |
|-------------------------------------------------|--------------|----------------|
| INV1 vs INV2 <sup>a</sup>                       | 0            | 3              |
| REV1 vs REV2 <sup>a</sup>                       | 0            | 0              |
| SIM vs (REV1, REV2) <sup>b</sup>                | 0            | 1              |
| REC vs (SIM1, REV1, REV2) <sup>b</sup>          | 3            | 13             |
| REC vs (INV1, INV2) <sup>b</sup>                | 0            | 1              |
| (INV1, INV2) vs (SIM1, REV1, REV2) <sup>b</sup> | 5            | 114            |

<sup>a</sup> Dataset S1. <sup>b</sup> Dataset S2.
