# Supplementary material for: Evaluation of the Role of Functional Constraints on the Integrity of an Ultraconserved Region in the Genus Drosophila
Source: PubMed Central journal article supplement (PMC3271063; doi:10.1371/journal.pgen.1002475), 2012-02-02
Supplement: pgen.1002475.s037.pdf [file pgen.1002475.s037.pdf]

**Table S18. Statistically significant enrichment for biological coherent patterns (GO term ontology, KEGG pathway, and Interpro domains) among genes differentially expressed in females in at least one of the six planned contrasts**

| Annotation |                                                                              | Contributing       |           |                      |
|------------|------------------------------------------------------------------------------|--------------------|-----------|----------------------|
| Cluster    | Term <sup>a</sup>                                                            | Genes <sup>b</sup> | Percent   | P value <sup>c</sup> |
| 1          | GO:0007601~visual perception ( <i>bp</i> )                                   | 9                  | 8.490566  | 2.08E-05             |
|            | GO:0050953~sensory perception of light stimulus ( <i>bp</i> )                | 9                  | 8.490566  | 1.55E-05             |
|            | GO:0007600~sensory perception ( <i>bp</i> )                                  | 11                 | 10.377358 | 0.0018081            |
| 2          | GO:0001505~regulation of neurotransmitter levels ( <i>bp</i> )               | 9                  | 8.490566  | 2.34E-04             |
|            | GO:0007268~synaptic transmission ( <i>bp</i> )                               | 10                 | 9.4339623 | 9.42E-04             |
|            | GO:0019226~transmission of nerve impulse ( <i>bp</i> )                       | 10                 | 9.4339623 | 9.89E-04             |
|            | GO:0007267~cell-cell signalling ( <i>bp</i> )                                | 10                 | 9.4339623 | 0.0013774            |
| 3          | GO:0007603~phototransduction, visible light ( <i>bp</i> )                    | 6                  | 5.6603774 | 4.44E-05             |
|            | GO:0009584~detection of visible light ( <i>bp</i> )                          | 6                  | 5.6603774 | 1.56E-04             |
|            | GO:0022400~regulation of rhodopsin mediated signalling pathway ( <i>bp</i> ) | 5                  | 4.7169811 | 2.97E-04             |
|            | GO:0016059~deactivation of rhodopsin mediated signalling ( <i>bp</i> )       | 5                  | 4.7169811 | 2.97E-04             |
|            | GO:0009586~rhodopsin mediated phototransduction ( <i>bp</i> )                | 5                  | 4.7169811 | 4.66E-04             |

**Table S18. Statistically significant enrichment for biological coherent patterns (GO term ontology, KEGG pathway, and Interpro domains) among genes differentially expressed in females in at least one of the six planned contrasts**

| Annotation |                                                                                              | Contributing       |           |                      |
|------------|----------------------------------------------------------------------------------------------|--------------------|-----------|----------------------|
| Cluster    | Term <sup>a</sup>                                                                            | Genes <sup>b</sup> | Percent   | P value <sup>c</sup> |
|            | GO:0016056~rhodopsin mediated signalling pathway ( <i>bp</i> )                               | 5                  | 4.7169811 | 5.38E-04             |
|            | GO:0050908~detection of light stimulus involved in visual reception ( <i>bp</i> )            | 5                  | 4.7169811 | 9.15E-04             |
|            | GO:0008277~regulation of G-protein coupled receptor protein signalling pathway ( <i>bp</i> ) | 5                  | 4.7169811 | 9.63E-04             |
|            | GO:0050962~detection of light stimulus involved in sensory perception ( <i>bp</i> )          | 5                  | 4.7169811 | 9.63E-04             |
|            | GO:0007602~phototransduction ( <i>bp</i> )                                                   | 6                  | 5.6603774 | 9.92E-04             |
|            | GO:0009583~detection of light stimulus ( <i>bp</i> )                                         | 6                  | 5.6603774 | 0.0015475            |
|            | GO:0009582~detection of abiotic stimulus ( <i>bp</i> )                                       | 6                  | 5.6603774 | 0.0022066            |
|            | GO:0009581~detection of external stimulus ( <i>bp</i> )                                      | 6                  | 5.6603774 | 0.0031789            |
|            | GO:0009416~response to light stimulus ( <i>bp</i> )                                          | 7                  | 6.6037736 | 0.0035542            |
|            | GO:0009314~response to radiation ( <i>bp</i> )                                               | 7                  | 6.6037736 | 0.0061349            |
|            | GO:0050906~detection of stimulus involved in sensory perception ( <i>bp</i> )                | 5                  | 4.7169811 | 0.0123216            |
|            | GO:0051606~detection of stimulus ( <i>bp</i> )                                               | 6                  | 5.6603774 | 0.0215457            |
|            | GO:0009628~response to abiotic stimulus ( <i>bp</i> )                                        | 8                  | 7.5471698 | 0.0263414            |

**Table S18. Statistically significant enrichment for biological coherent patterns (GO term ontology, KEGG pathway, and Interpro domains) among genes differentially expressed in females in at least one of the six planned contrasts**

| Annotation |                                                                              | Contributing       |           |                      |
|------------|------------------------------------------------------------------------------|--------------------|-----------|----------------------|
| Cluster    | Term <sup>a</sup>                                                            | Genes <sup>b</sup> | Percent   | P value <sup>c</sup> |
| 4          | GO:0042133~neurotransmitter metabolic process ( <i>bp</i> )                  | 4                  | 3.7735849 | 9.80E-04             |
|            | GO:0042136~neurotransmitter biosynthetic process ( <i>bp</i> )               | 3                  | 2.8301887 | 0.011968             |
| 5          | GO:0042133~neurotransmitter metabolic process ( <i>bp</i> )                  | 4                  | 3.7735849 | 9.80E-04             |
|            | GO:0008291~acetylcholine metabolic process ( <i>bp</i> )                     | 3                  | 2.8301887 | 0.0043694            |
|            | GO:0042439~ethanolamine and derivative metabolic process ( <i>bp</i> )       | 3                  | 2.8301887 | 0.0329842            |
| 6          | GO:0042398~cellular amino acid derivative biosynthetic process ( <i>bp</i> ) | 5                  | 4.7169811 | 0.0014427            |
|            | GO:0006576~biogenic amine metabolic process ( <i>bp</i> )                    | 5                  | 4.7169811 | 0.0039768            |
| 7          | GO:0045202~synapse ( <i>cc</i> )                                             | 7                  | 6.6037736 | 0.0482615            |
|            | GO:0030054~cell junction ( <i>cc</i> )                                       | 7                  | 6.6037736 | 0.0416167            |

**Table S18. Statistically significant enrichment for biological coherent patterns (GO term ontology, KEGG pathway, and Interpro domains) among genes differentially expressed in females in at least one of the six planned contrasts**

| Annotation |                                                           | Contributing       |           |                      |
|------------|-----------------------------------------------------------|--------------------|-----------|----------------------|
| Cluster    | Term <sup>a</sup>                                         | Genes <sup>b</sup> | Percent   | P value <sup>c</sup> |
| 8          | GO:0048066~pigmentation during development ( <i>bp</i> )  | 5                  | 4.7169811 | 0.024407             |
|            | GO:0043473~pigmentation ( <i>bp</i> )                     | 5                  | 4.7169811 | 0.0274781            |
|            | GO:0006726~eye pigment biosynthetic process ( <i>bp</i> ) | 4                  | 3.7735849 | 0.0392668            |
|            | GO:0042441~eye pigment metabolic process ( <i>bp</i> )    | 4                  | 3.7735849 | 0.0414843            |
| 9          | GO:0006887~exocytosis ( <i>bp</i> )                       | 5                  | 4.716981  | 0.0315               |

Results according to DAVID [1]. <sup>a</sup> *bp* (biological process) and *cc* (cellular component) refer to different GO term categories. <sup>b</sup> Number of genes contributing to a particular functional class. <sup>c</sup> After Benjamini-Hochberg correction.

#### Supporting References

1. Huang da W, Sherman BT, Lempicki RA (2009) Systematic and integrative analysis of large gene lists using DAVID bioinformatics resources. Nat Protoc 4: 44-57.
