# Supplementary material for: Evaluation of the Role of Functional Constraints on the Integrity of an Ultraconserved Region in the Genus Drosophila
Source: PubMed Central journal article supplement (PMC3271063; doi:10.1371/journal.pgen.1002475), 2012-02-02
Supplement: pgen.1002475.s038.pdf [file pgen.1002475.s038.pdf]

**Table S19. Ability to detect significant differences between flies carrying the ultraconserved region *CG15121-CG1689* in its disrupted or intact form across some of the experiments performed**

| Experiment <sup>a</sup>                                   | Sample Size |                          |                          |
|-----------------------------------------------------------|-------------|--------------------------|--------------------------|
|                                                           | Actual      | Power = 0.5 <sup>b</sup> | Power = 0.8 <sup>b</sup> |
| Heterozygous crosses (male progeny)                       | 35          | 42                       | 78                       |
| Heterozygous crosses (sex ratio)                          | 35          | 42                       | 75                       |
| Heterozygous crosses (Mendelian proportions) <sup>c</sup> | 712         | 794                      | 1,543                    |
| Mating ability (1 h)                                      | 30          | 45                       | 81                       |
| Mating ability (6 h)                                      | 30          | 666                      | 1,293                    |
| Sperm competition (reciprocal crosses)                    | 55          | 996                      | 1,932                    |
| Negative gravitaxis (males)                               | 60          | 330                      | 636                      |
| Heat-shock resistance (females)                           | 15          | 21                       | 39                       |
| Desiccation resistance (females)                          | 60          | 223,374                  | 434,181                  |

<sup>a</sup> Carriers of chromosomes with the ultraconserved region in its disrupted form (INV1, INV2) showed lower values than the carriers of the ultraconserved region in its intact form (REC) but the difference was not statistically significant at  $\alpha = 0.05$ , samples size used, variances associated with the traits analyzed, and power achieved. <sup>b</sup> As estimated with GPower 3.1.3 [1]. <sup>c</sup> For the male progeny of heterozygous crosses involving INV2/REV2, the closest case to show statistically significant differences from the expected Mendelian ratios ( $P = 0.1055$ ).

### Supporting References

1. Faul F, Erdfelder E, Lang AG, Buchner A (2007) G\*Power 3: a flexible statistical power analysis program for the social, behavioral, and biomedical sciences. *Behav Res Methods* 39: 175-191.
