# Supplementary material for: Evaluation of the Role of Functional Constraints on the Integrity of an Ultraconserved Region in the Genus Drosophila
Source: PubMed Central journal article supplement (PMC3271063; doi:10.1371/journal.pgen.1002475), 2012-02-02
Supplement: pgen.1002475.s039.pdf [file pgen.1002475.s039.pdf]

**Table S20. Number of tRNA, rRNA, and snoRNA genes in the ultraconserved region *CG15121-CG16894* with potential to mediate NAHR events**

| Species (release) <sup>a</sup> | tRNA genes | rRNA genes | snoRNA |
|--------------------------------|------------|------------|--------|
| <i>D. melanogaster</i> (5.31)  | 9          | 104        | 1      |
| <i>D. yakuba</i> (1.3)         | 10         | 15         | 1      |
| <i>D. erecta</i> (1.3)         | 8          | 17         | 1      |
| <i>D. ananassae</i> (1.3)      | 9          | 0          | 0      |
| <i>D. pseudoobscura</i> (2.21) | 6          | 0          | 0      |
| <i>D. willistoni</i> (1.3)     | 17         | 0          | 0      |
| <i>D. virilis</i> (1.2)        | 4          | 3          | 0      |
| <i>D. mojavensis</i> (1.3)     | 7          | 0          | 0      |
| <i>D. grimshawi</i> (1.3)      | 5          | 0          | 0      |

Between *CG8517* and *CG12501* [1]; pseudogenes are also included.

<sup>a</sup> Those previously examined [2] and sorted by their phylogenetic distance to *D. melanogaster*.

### Supporting References

1. Tweedie S, Ashburner M, Falls K, Leyland P, McQuilton P, et al. (2009) FlyBase: enhancing Drosophila Gene Ontology annotations. *Nucleic Acids Res* 37: D555-559.
2. von Grotthuss M, Ashburner M, Ranz JM (2010) Fragile regions and not functional constraints predominate in shaping gene organization in the genus *Drosophila*. *Genome Res* 20: 1084-1096.
